# Supplementary material
Source: publisher figshare collection journal article supplement (https://tandf.figshare.com/ndownloader/files/17811374)
Supplement: Supplementary file 1 [file 17811374]

Supplementary Information

Studies on the Mesophase Formation Mechanism of Polybenzoxazines: Polymerization Induction

Ying Liu, Xiaoshan Zhen, Sheng Gao, Qingbin Xue and Zaijun Lu*

Key Laboratory for Special Functional Aggregated Materials of Ministry of Education, School of Chemistry and Chemical Engineering, Shandong University, Jinan, 250100, P. R. China

*Corresponding author (Z.L.): z.lu@sdu.edu.cn.


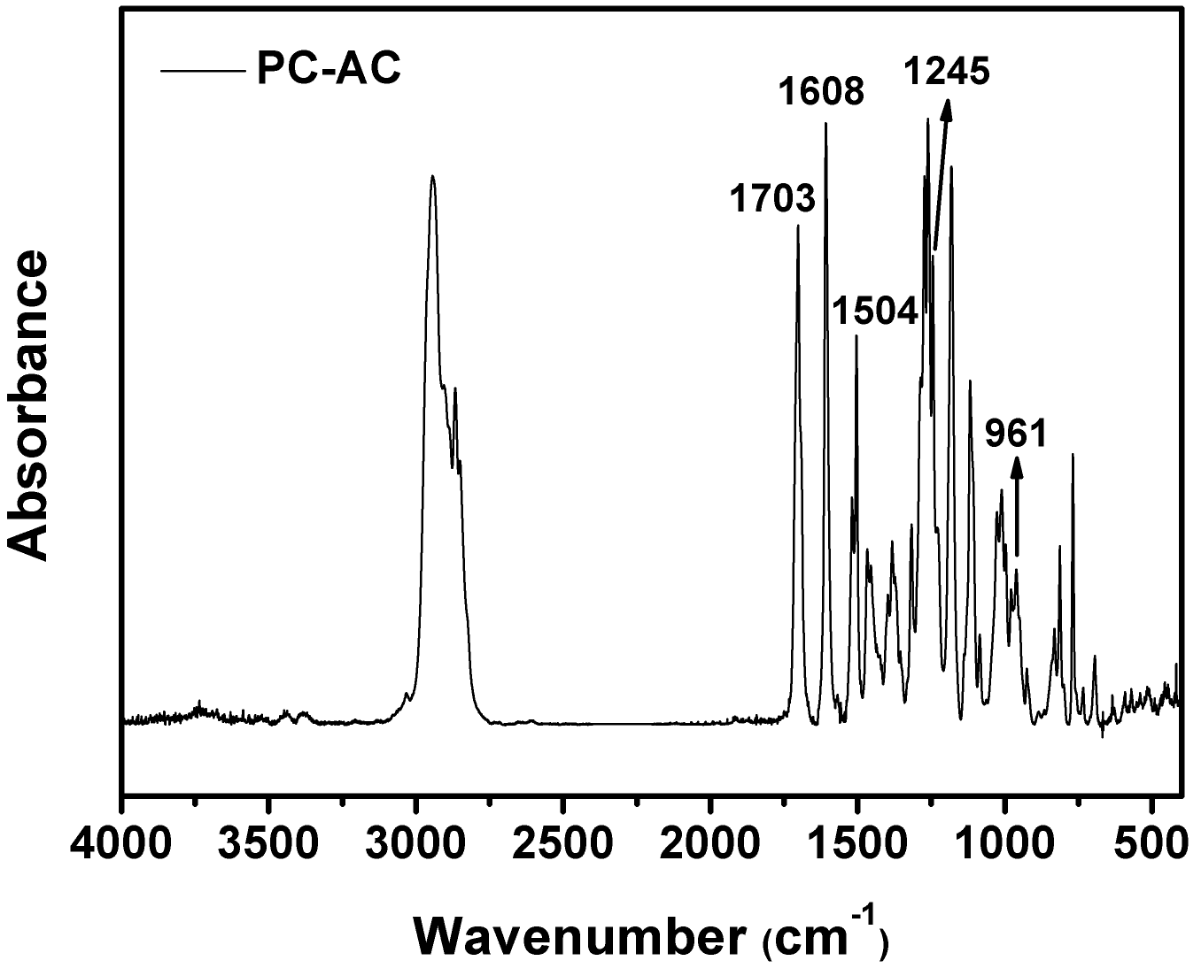


**Figure S1.** FTIR spectrum of PC-AC monomer.


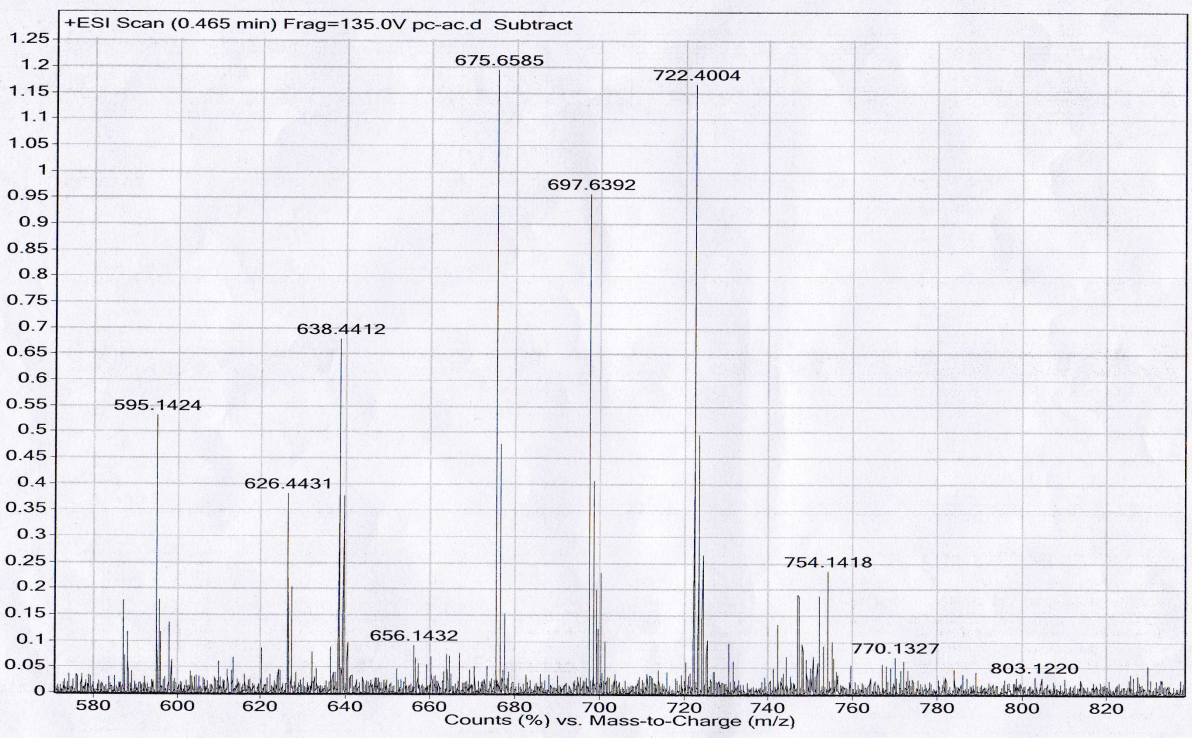


**Figure S2.** ESI MS spectrum of PC-AC monomer.


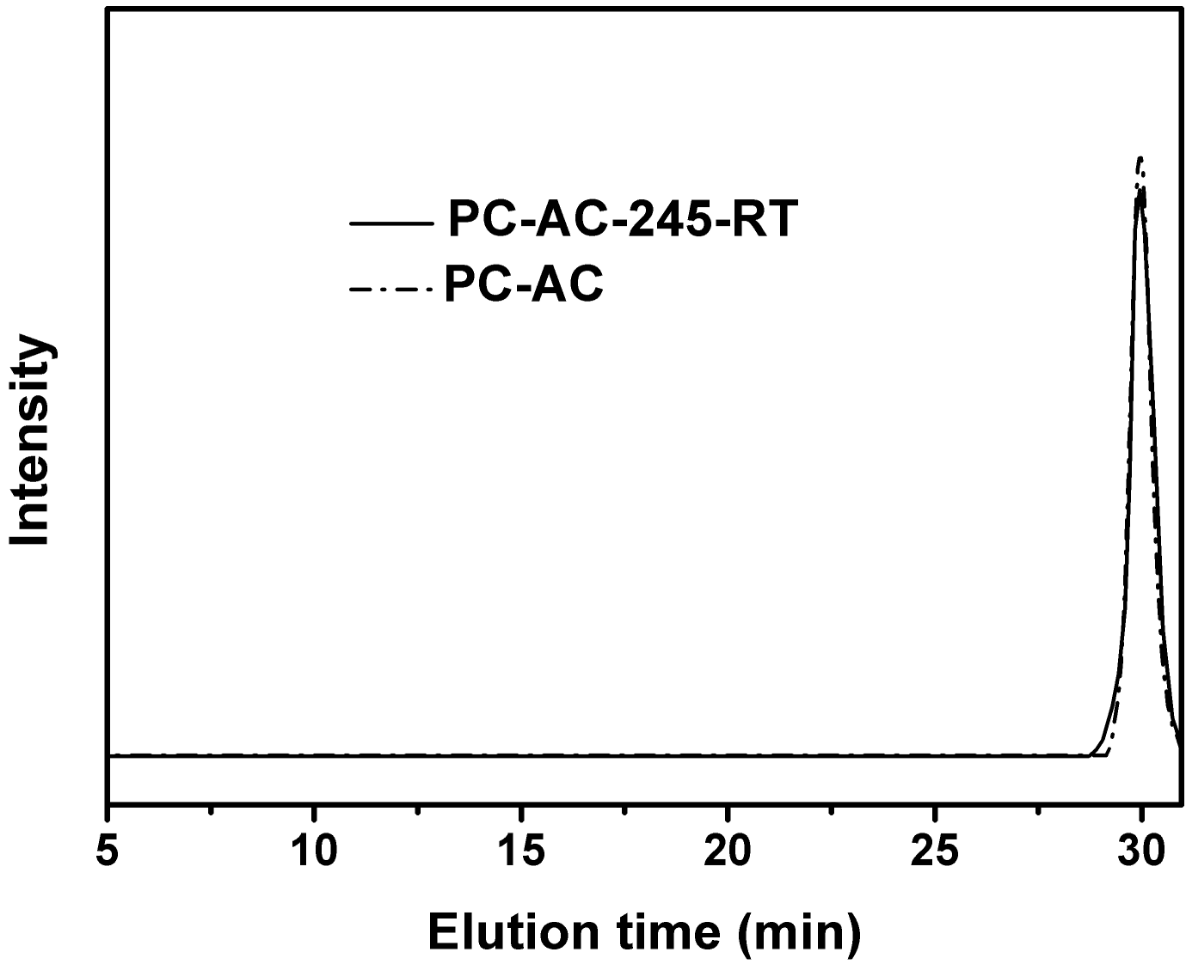


**Figure S3.** GPC chromatograms of PC-AC-245-RT and PC-AC.


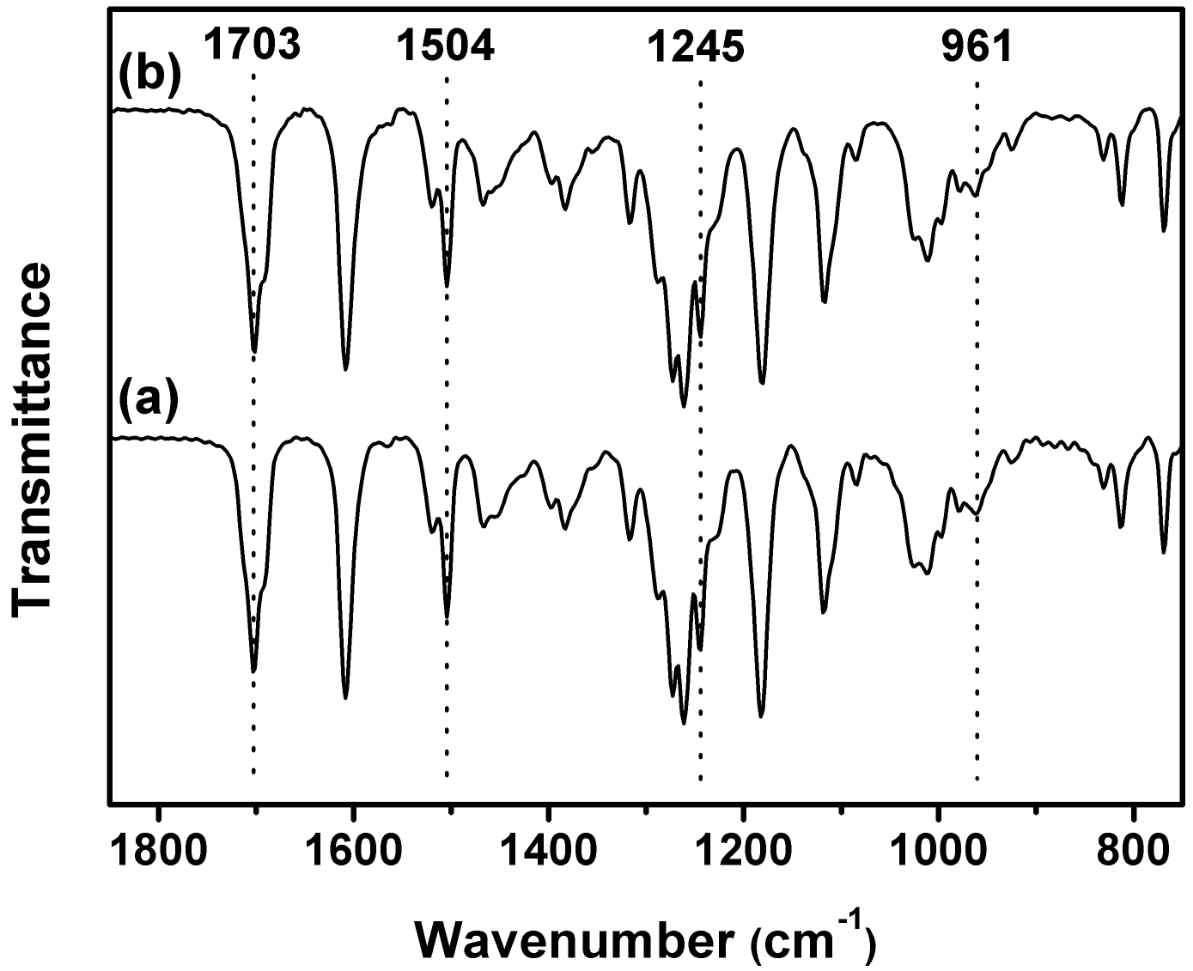


**Figure S4.** FTIR spectra of (a) PC-AC-245-RT and (b) PC-AC.


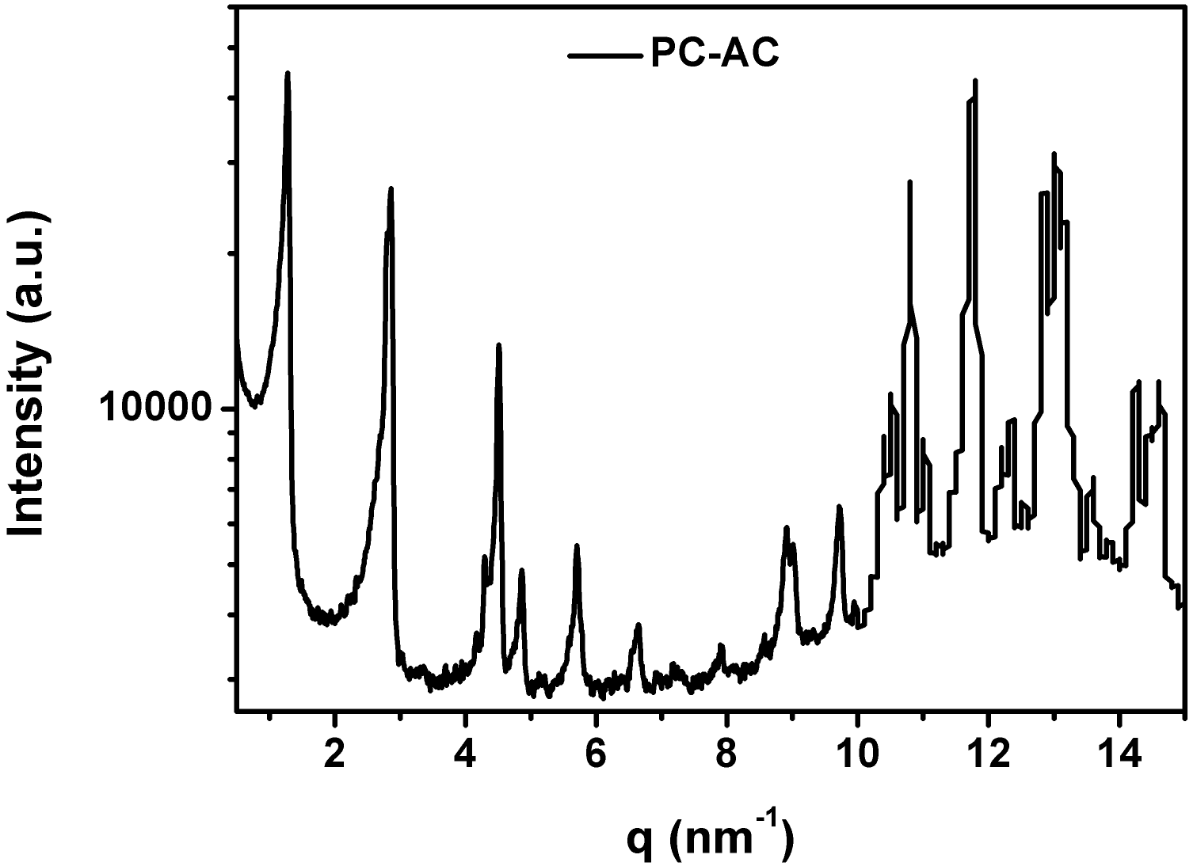


**Figure S5.** SAXS profile of PC-AC monomer at 190 oC upon cooling.


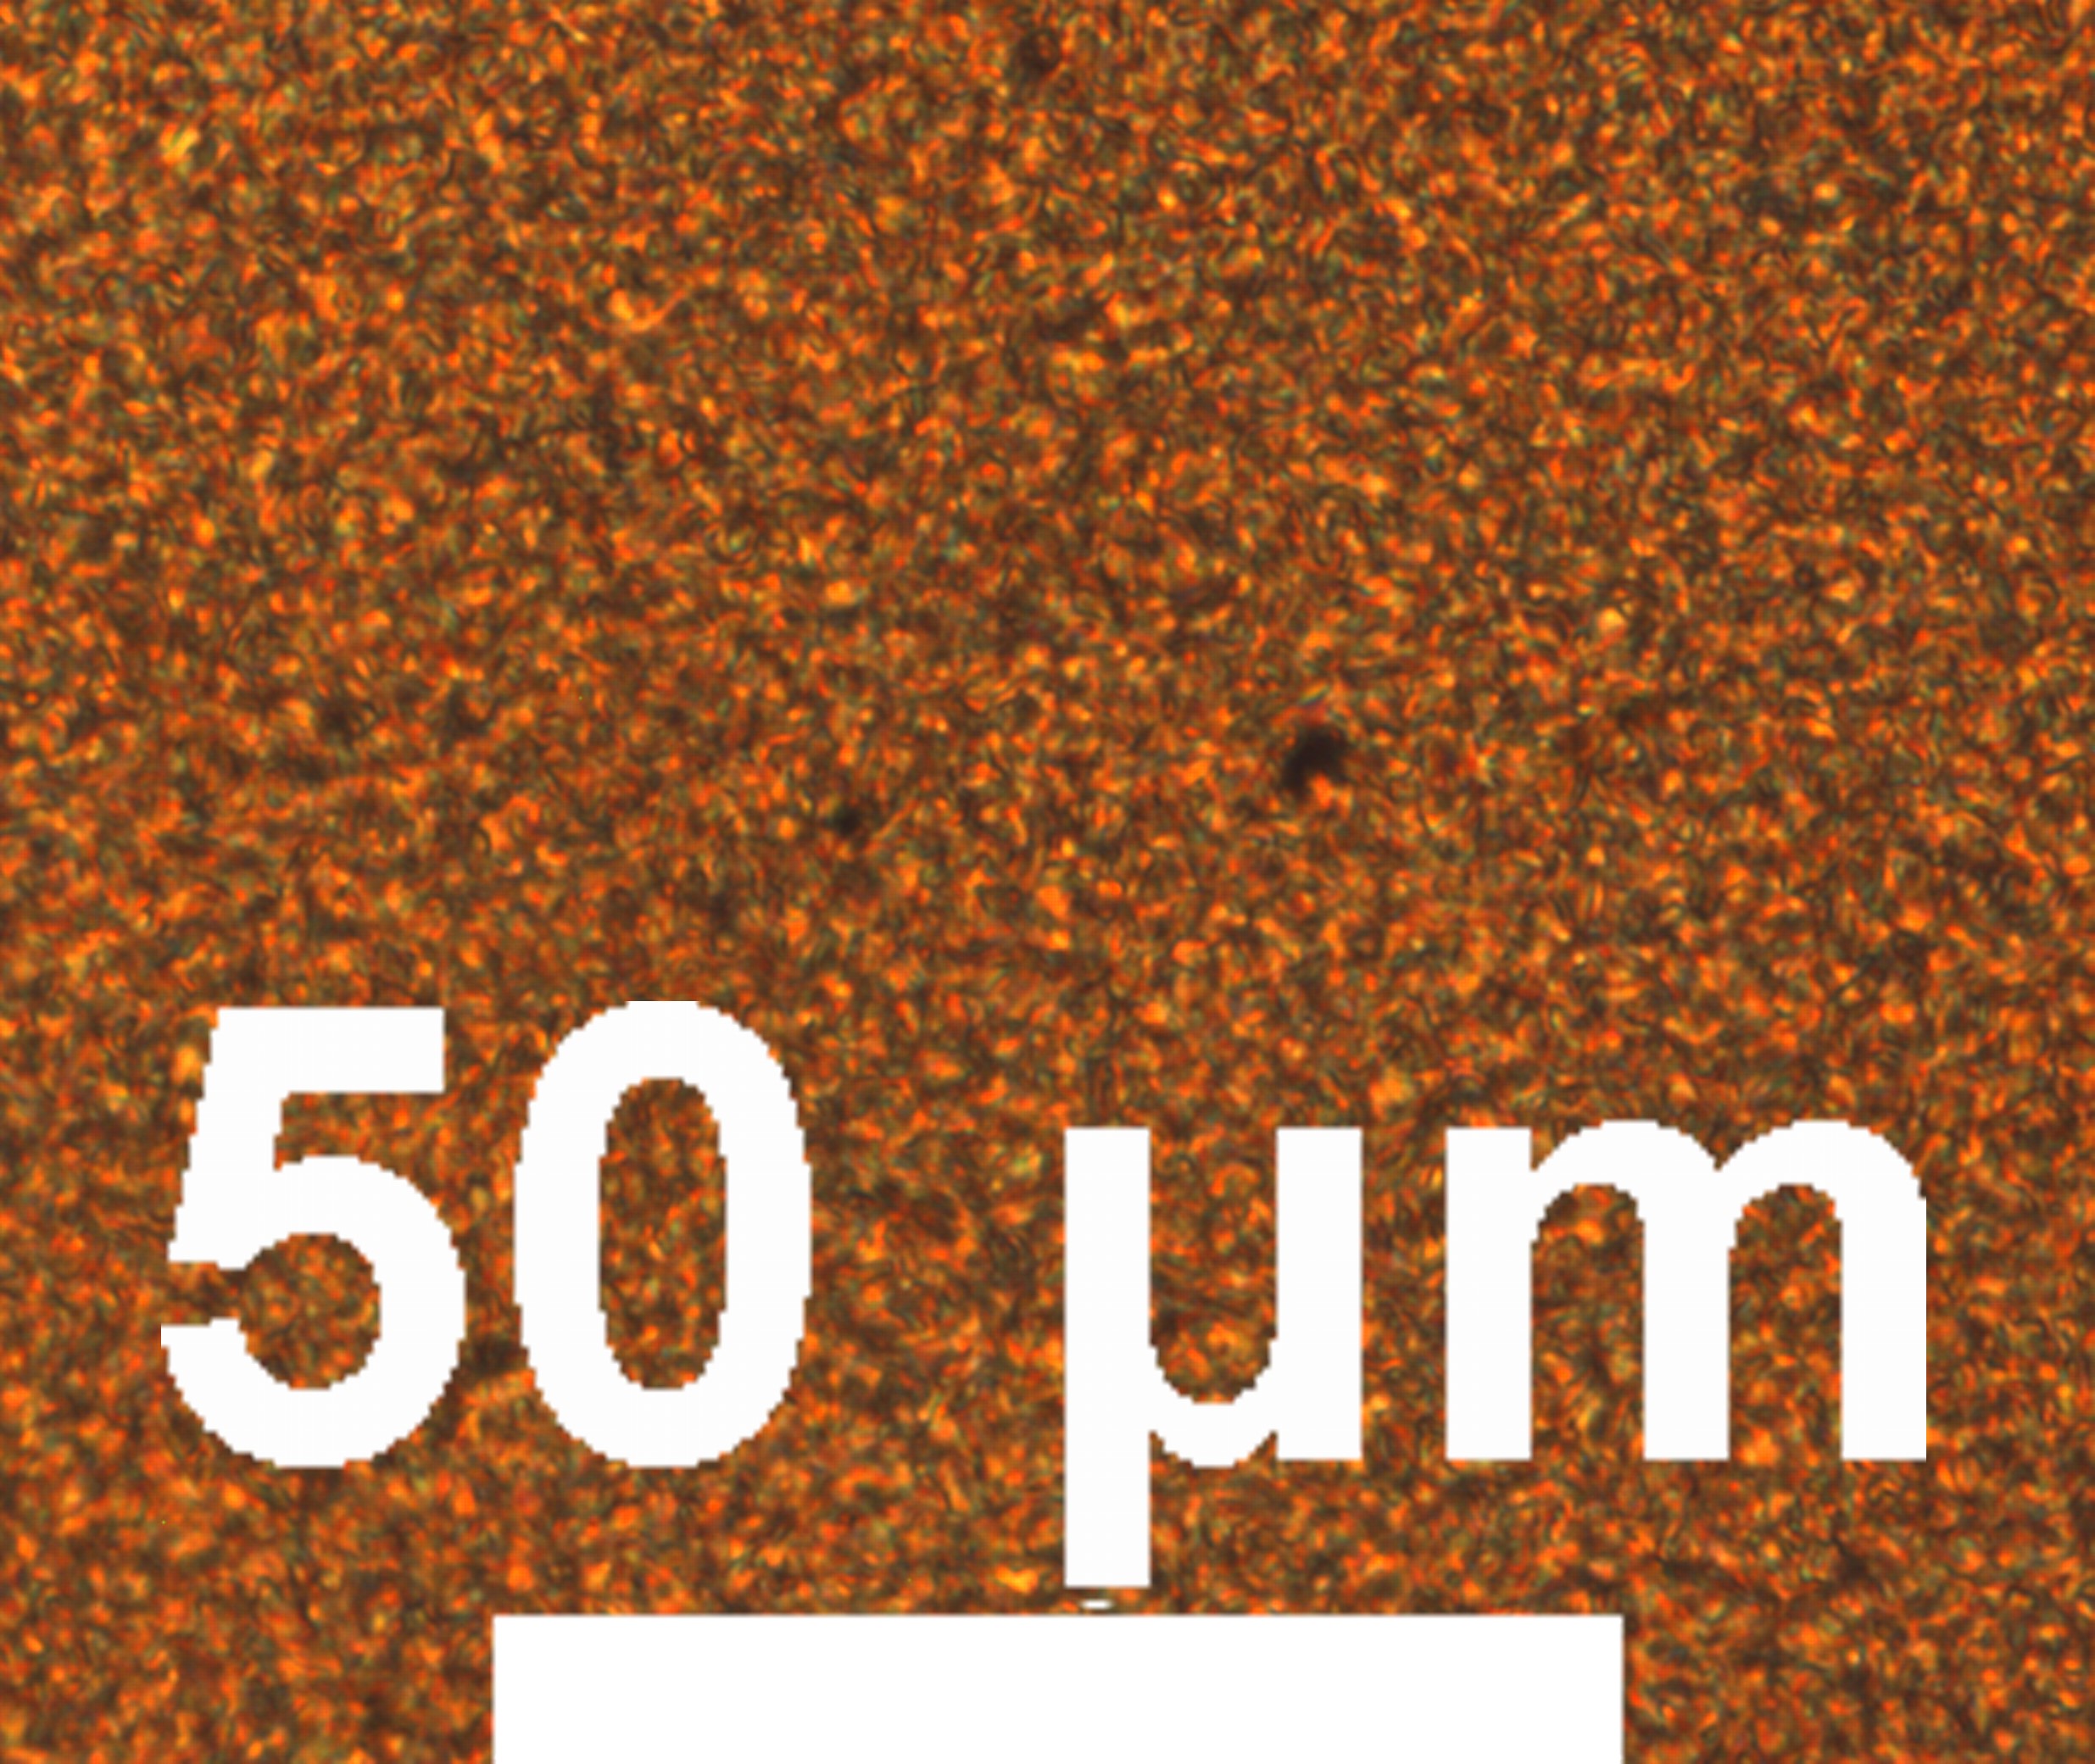


**Figure S6.** POM image of poly(PC-AC) at 165 oC upon cooling.


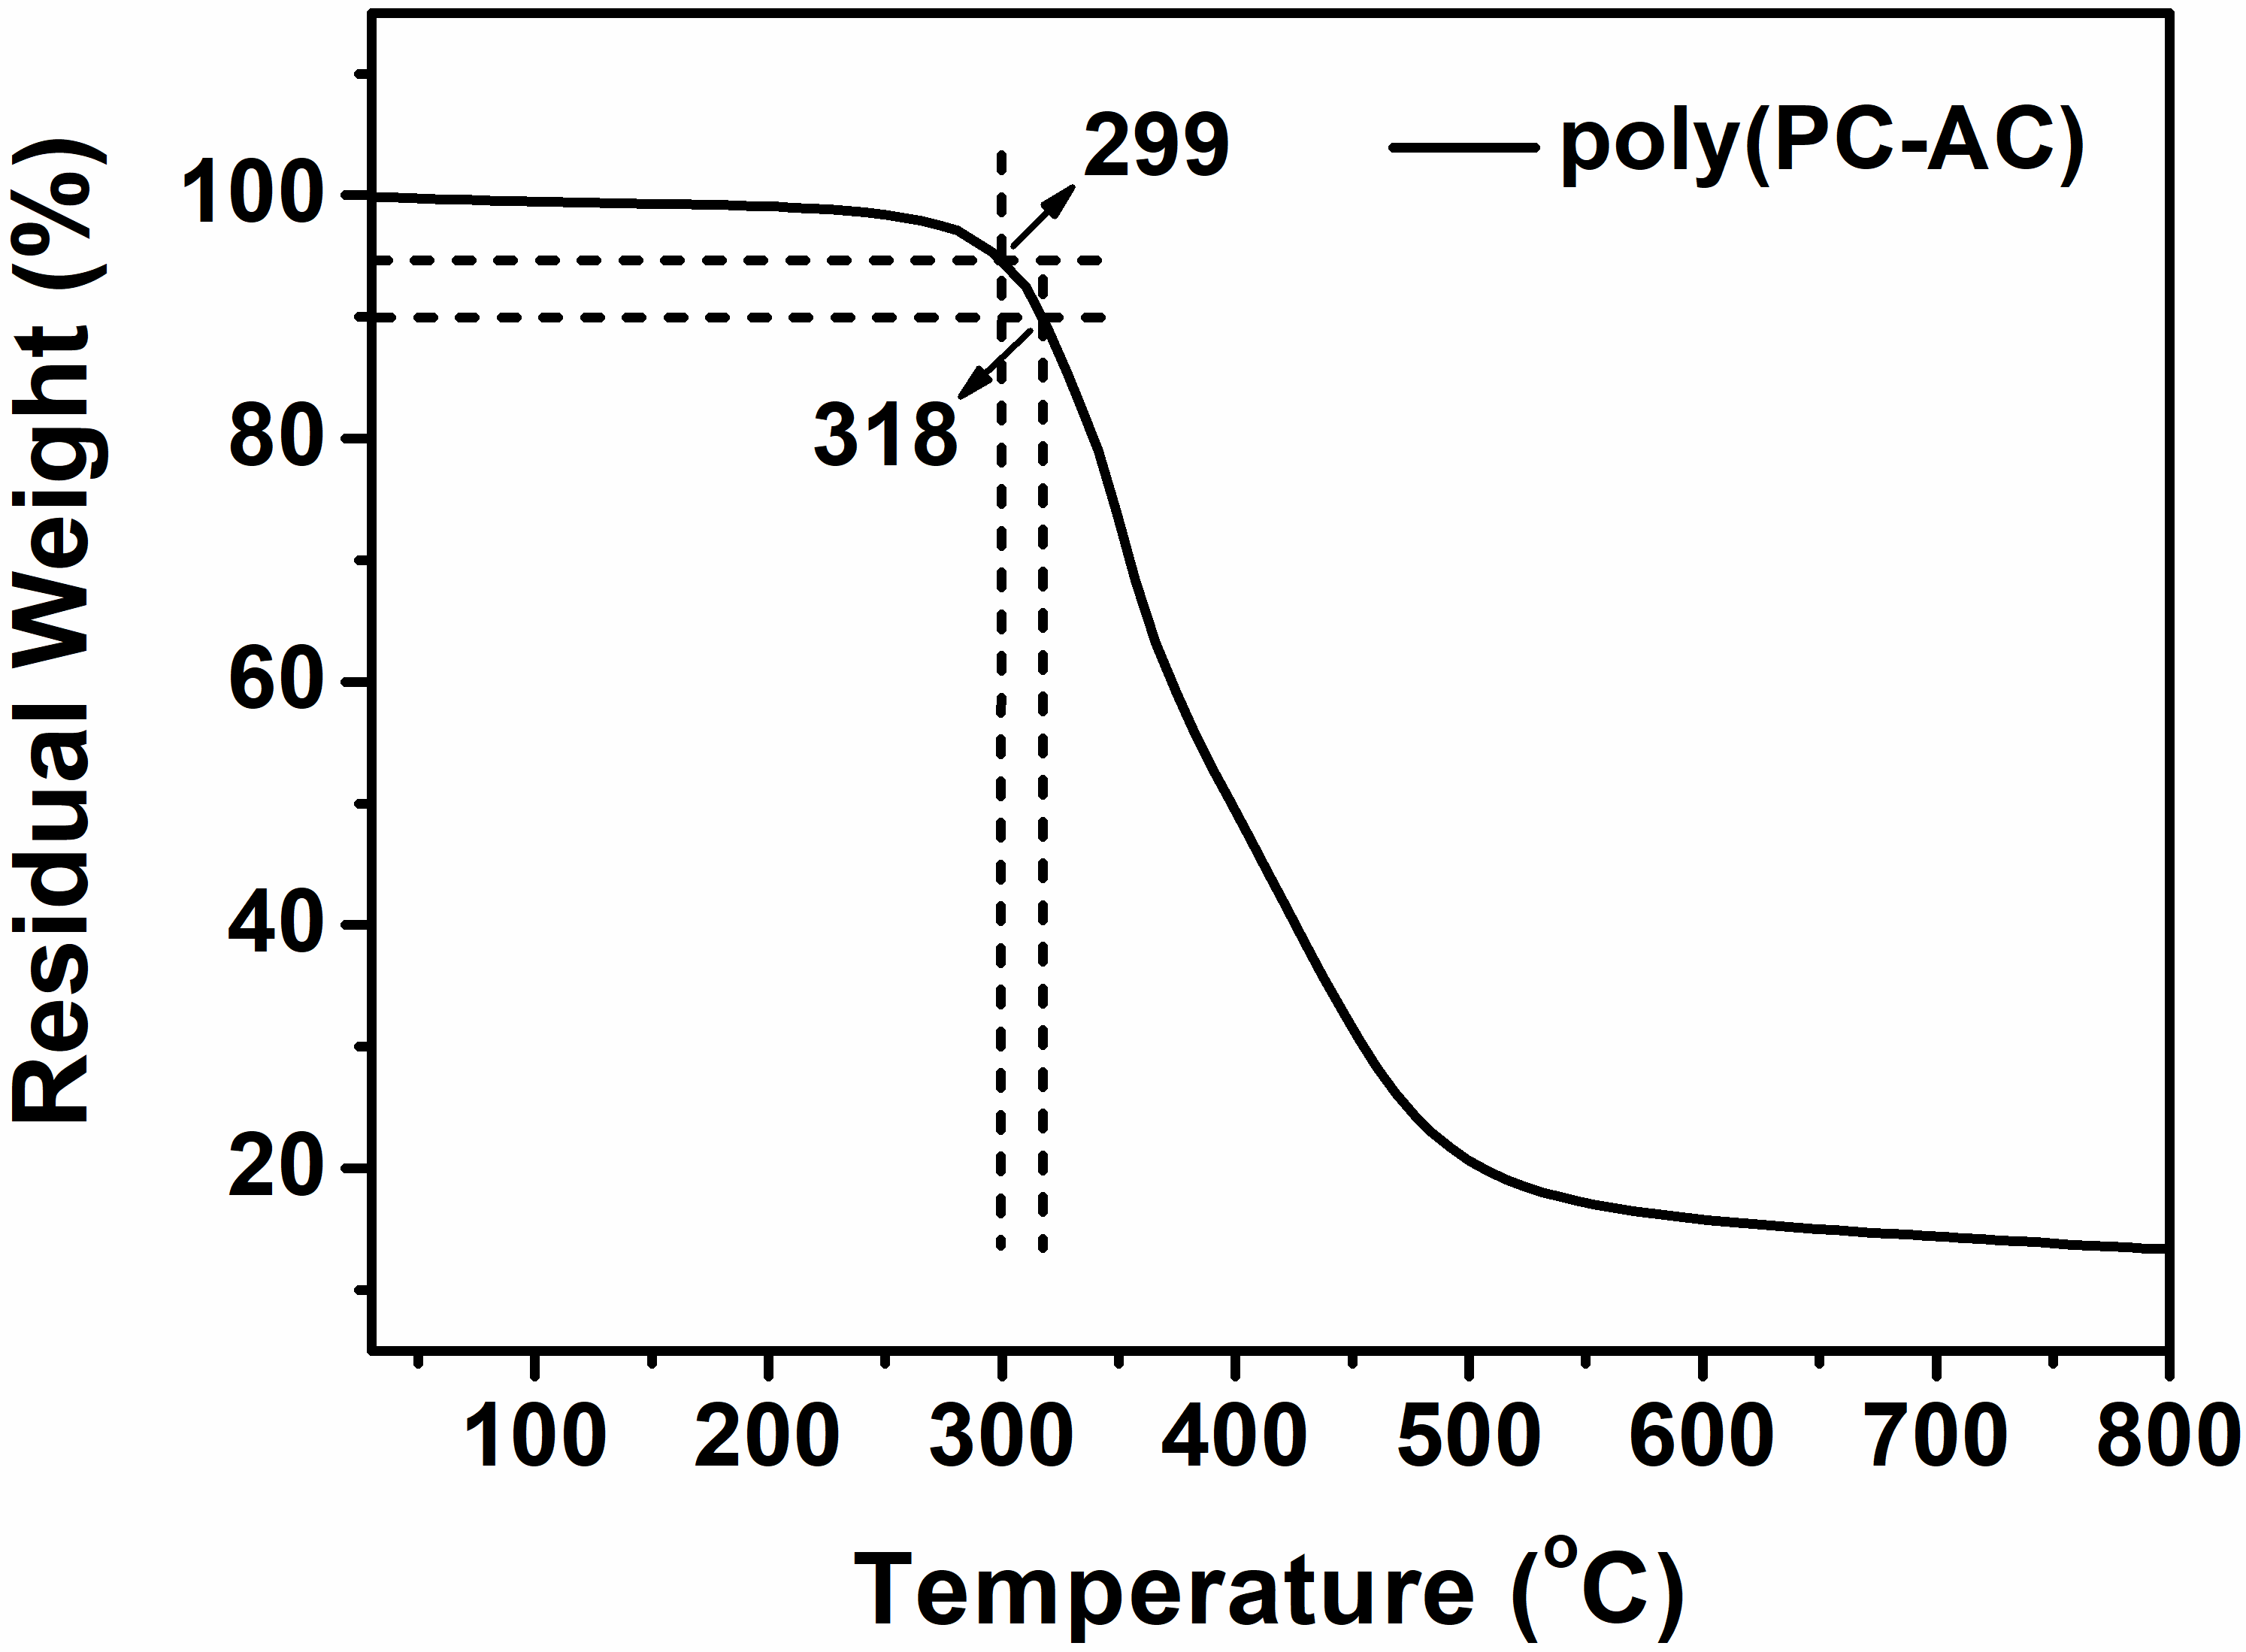


**Figure S7.** TGA thermogram of poly(PC-AC).
